# Supplementary material for: Synthesis of Curcuminoids and Evaluation of Their Cytotoxic and Antioxidant Properties
Source: PubMed Central journal article supplement (PMC6154528; doi:10.3390/molecules22040633), 2017-04-14
Supplement: molecules-22-00633-s001.pdf [file molecules-22-00633-s001.pdf]

# Synthesis of curcuminoids and evaluation of their cytotoxic and antioxidant properties

**María Concepción Lozada-García<sup>1,†</sup>, Raúl G. Enríquez<sup>1</sup>, Teresa O. Ramírez-Apán<sup>2</sup>, Antonio Nieto-Camacho<sup>2</sup>, Juan F. Palacios-Espinosa<sup>1</sup>, Zeltzin Custodio-Galván<sup>1</sup>, Olivia Soria-Arteche<sup>1\*</sup> and Jaime Pérez-Villanueva<sup>1\*</sup>**

<sup>1</sup>Departamento de Sistemas Biológicos, División de Ciencias Biológicas y de la Salud, Universidad Autónoma Metropolitana-Xochimilco (UAM-X), Ciudad de México 04960, México

<sup>2</sup>Instituto de Química, Universidad Nacional Autónoma de México (UNAM), Ciudad de México 04510, México

\* These authors contributed equally to this work

Correspondence: [jp villanueva@correo.xoc.uam.mx](mailto:jp villanueva@correo.xoc.uam.mx) (J.P-V.); [soriao@correo.xoc.uam.mx](mailto:soriao@correo.xoc.uam.mx) (O.S-A.); Tel: +52 5483 7259 (J.P-V. and O.S-A.).

## Table of contents

| Figure                                                                                                                         | pages |
|--------------------------------------------------------------------------------------------------------------------------------|-------|
| S1. Mass spectrum of compound <b>1</b> recorded in a MStation equipment by direct inlet and EI mode ion detection              | 3     |
| S2. NMR <sup>1</sup> H spectrum of compound <b>1</b> recorded in a Bruker 500 MHz and CDCl <sub>3</sub> as solvent.            | 3     |
| S3. NMR <sup>13</sup> C spectrum of compound <b>1</b> recorded in a Bruker 500 MHz and CDCl <sub>3</sub> as solvent.           | 4     |
| S4. Mass spectrum of compound <b>2</b> recorded in a Jeol JMS-AX505HA equipment by direct inlet and EI mode ion detection.     | 5     |
| S5. NMR <sup>1</sup> H spectrum of compound <b>2</b> recorded in a Gemini 200 MHz of Varian and CDCl <sub>3</sub> as solvent.  | 5     |
| S6. NMR <sup>13</sup> C spectrum of compound <b>2</b> recorded in a Gemini 200 MHz of Varian and CDCl <sub>3</sub> as solvent. | 6     |
| S7. NMR <sup>1</sup> H spectrum of compound <b>3</b> recorded in a Bruker 500 MHz and CDCl <sub>3</sub> as solvent.            | 7     |
| S8. NMR <sup>13</sup> C spectrum of compound <b>3</b> recorded in a Bruker 500 MHz and CDCl <sub>3</sub> as solvent.           | 7     |

|                                                                                                                              |    |
|------------------------------------------------------------------------------------------------------------------------------|----|
| S9. Mass spectrum of compound <b>4</b> recorded in a Jeol JMS-AX505HA equipment by direct inlet and EI mode ion detection.   | 8  |
| S10. NMR <sup>1</sup> H spectrum of compound <b>4</b> recorded in a Bruker 500 MHz and CDCl <sub>3</sub> as solvent.         | 8  |
| S11. NMR <sup>13</sup> C spectrum of compound <b>4</b> recorded in a Bruker 500 MHz and CDCl <sub>3</sub> as solvent.        | 9  |
| S12. Mass spectrum of compound <b>5</b> recorded in a Jeol JMS-AX505HA equipment by direct inlet and EI mode ion detection.  | 10 |
| S13. NMR <sup>1</sup> H spectrum of compound <b>5</b> recorded in a Varian 600 MHz and DMSO as solvent.                      | 10 |
| S14. NMR <sup>13</sup> C spectrum of compound <b>5</b> recorded in a Varian 600 MHz and DMSO as solvent.                     | 11 |
| S15. Mass spectrum of compound <b>6</b> in a JEOL GCmate equipment by direct inlet and EI mode ion detection.                | 12 |
| S16. NMR <sup>1</sup> H spectrum of compound <b>6</b> recorded in a Varian 600 MHz and CDCl <sub>3</sub> as a solvent.       | 12 |
| S17. NMR <sup>13</sup> C spectrum of compound <b>6</b> recorded in a Varian 600 MHz and CDCl <sub>3</sub> as solvent.        | 13 |
| S18. Mass spectrum of compound <b>7</b> in a JEOL GCmate equipment by direct inlet and EI mode ion detection.                | 14 |
| S19. NMR <sup>1</sup> H spectrum of compound <b>7</b> recorded in a Varian 600 MHz and CDCl <sub>3</sub> as solvent.         | 14 |
| S20. NMR <sup>13</sup> C spectrum of compound <b>7</b> recorded in a Varian 600 MHz and CDCl <sub>3</sub> as solvent.        | 15 |
| S21. Mass spectrum of compound <b>8</b> recorded in an MStation equipment by direct inlet and EI mode ion detection.         | 16 |
| S22. NMR <sup>1</sup> H spectrum of compound <b>8</b> recorded in a Varian 600 MHz and CDCl <sub>3</sub> as solvent.         | 16 |
| S23. NMR <sup>13</sup> C spectrum of compound <b>8</b> recorded in a Varian 600 MHz and CDCl <sub>3</sub> as solvent.        | 17 |
| S24. Mass spectrum of compound <b>9</b> recorded in a micrOTOF equipment and ESI mode ion detection.                         | 18 |
| S25. NMR <sup>1</sup> H spectrum of compound <b>9</b> recorded in a Varian 600 MHz and CDCl <sub>3</sub> as solvent.         | 18 |
| S26. NMR <sup>13</sup> C spectrum of compound <b>9</b> recorded in a Varian 600 MHz and CDCl <sub>3</sub> as solvent.        | 19 |
| S27. Mass spectrum of compound <b>10</b> recorded in a Jeol JMS-AX505HA equipment by direct inlet and EI mode ion detection. | 20 |
| S28. NMR <sup>1</sup> H spectrum of compound <b>10</b> recorded in a Bruker 300 MHz and CDCl <sub>3</sub> as solvent.        | 20 |
| S29. NMR <sup>13</sup> C spectrum of compound <b>10</b> recorded in a Bruker 300 MHz and CDCl <sub>3</sub> as solvent.       | 21 |
| S30. Mass spectrum of compound <b>11</b> recorded in a Jeol JMS-AX505HA equipment by direct inlet and EI mode ion detection. | 22 |
| S31. NMR <sup>1</sup> H spectrum of compound <b>11</b> recorded in a Bruker 300 MHz and CDCl <sub>3</sub> as solvent.        | 22 |
| S32. NMR <sup>13</sup> C spectrum of compound <b>11</b> recorded in a Bruker 300 MHz and CDCl <sub>3</sub> as solvent.       | 23 |

---

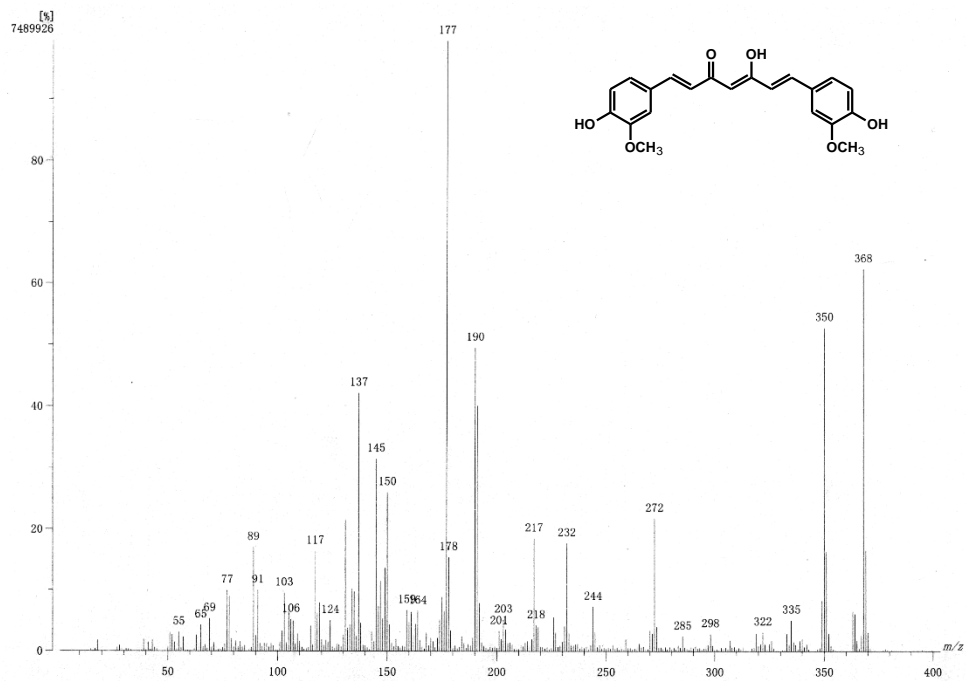

S1. Mass spectrum of compound 1 recorded in a MStation equipment by direct inlet and EI mode ion detection.

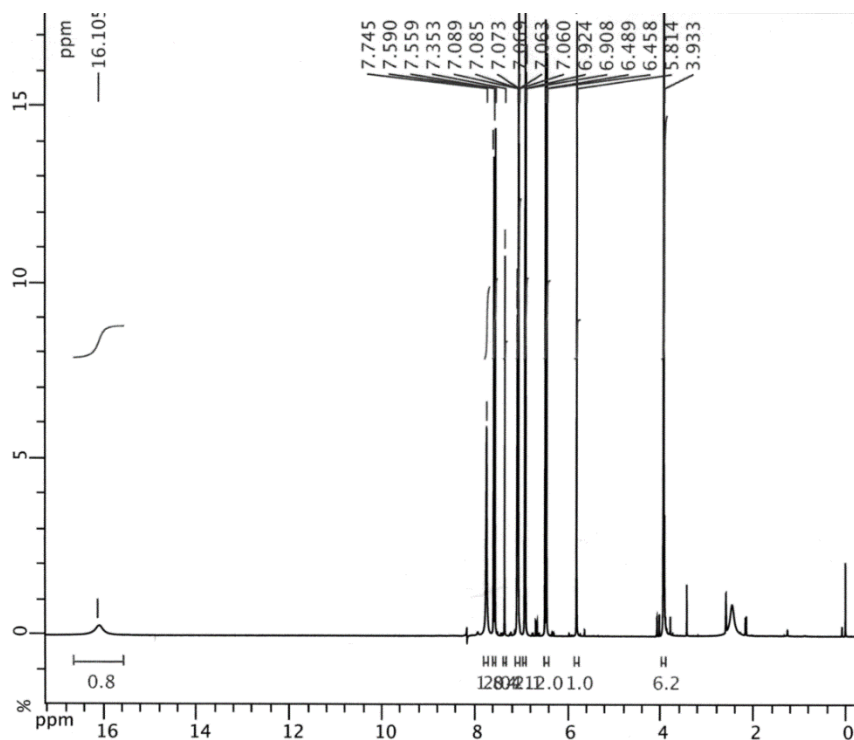

S2. NMR  $^1\text{H}$  spectrum of compound **1** recorded in a Bruker 500 MHz and  $\text{CDCl}_3$  as solvent.

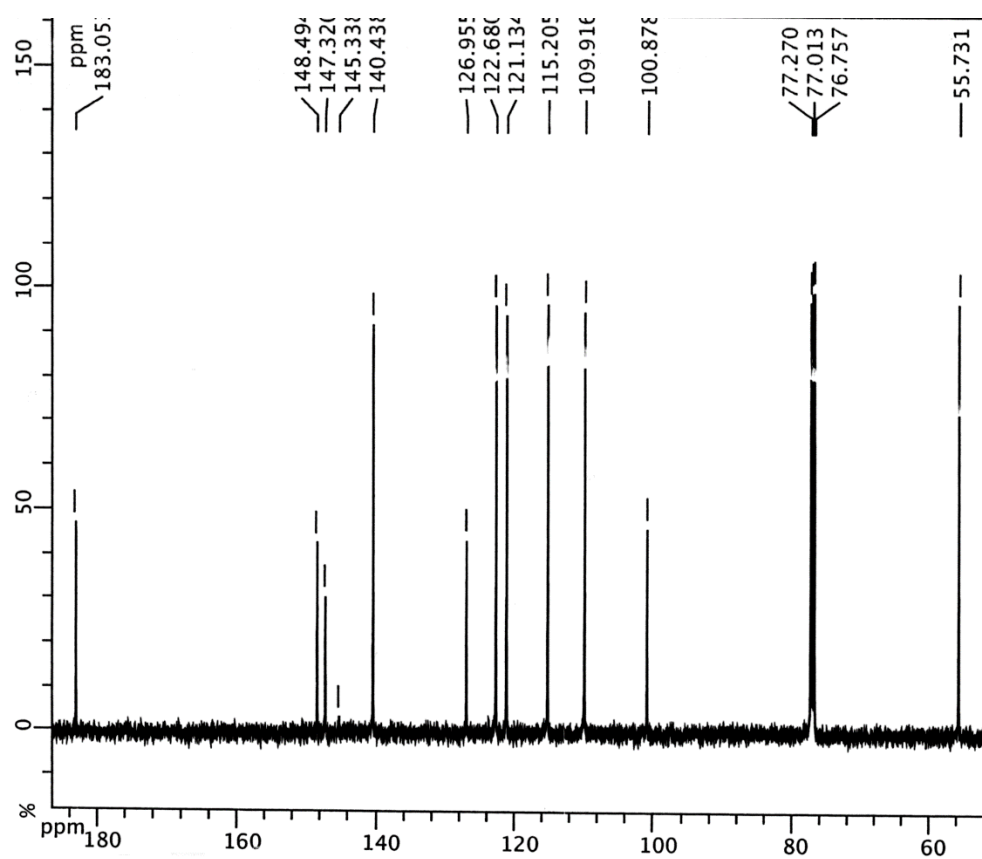

S3. NMR  $^{13}\text{C}$  spectrum of compound **1** recorded in a Bruker 500 MHz and  $\text{CDCl}_3$  as solvent.

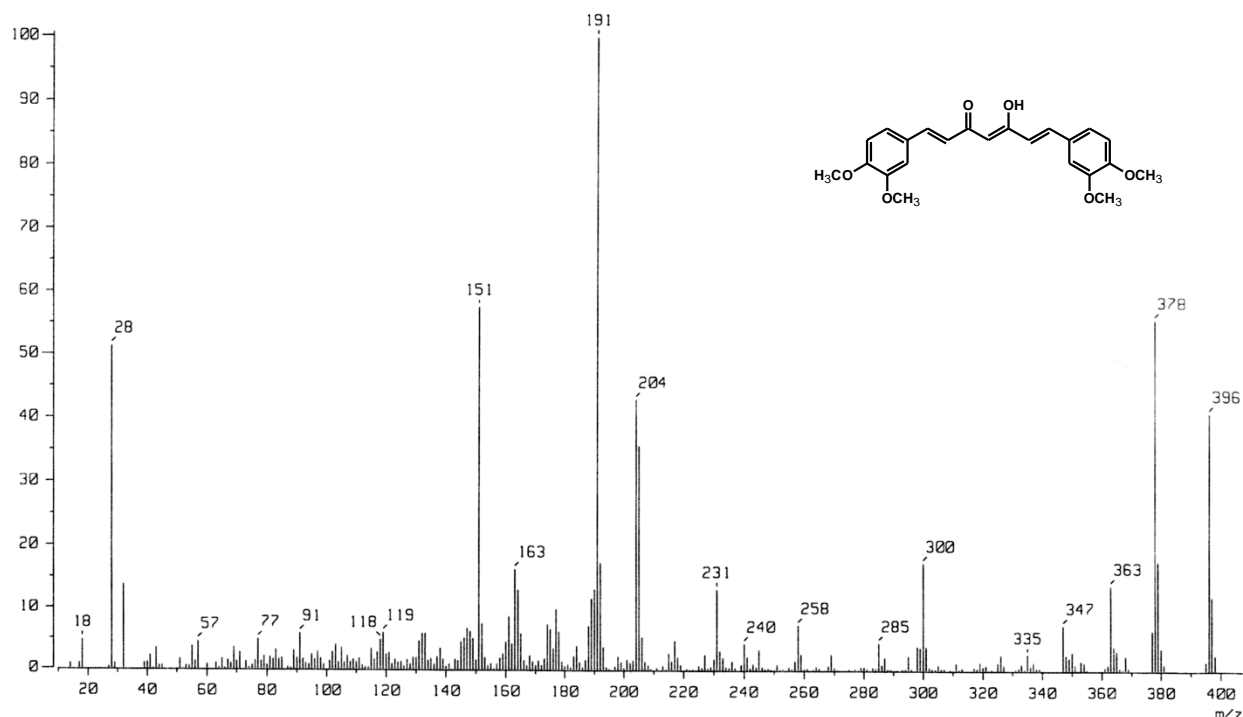

S4. Mass spectrum of compound 2 recorded in a Jeol JMS-AX505HA equipment by direct inlet and EI mode ion detection.

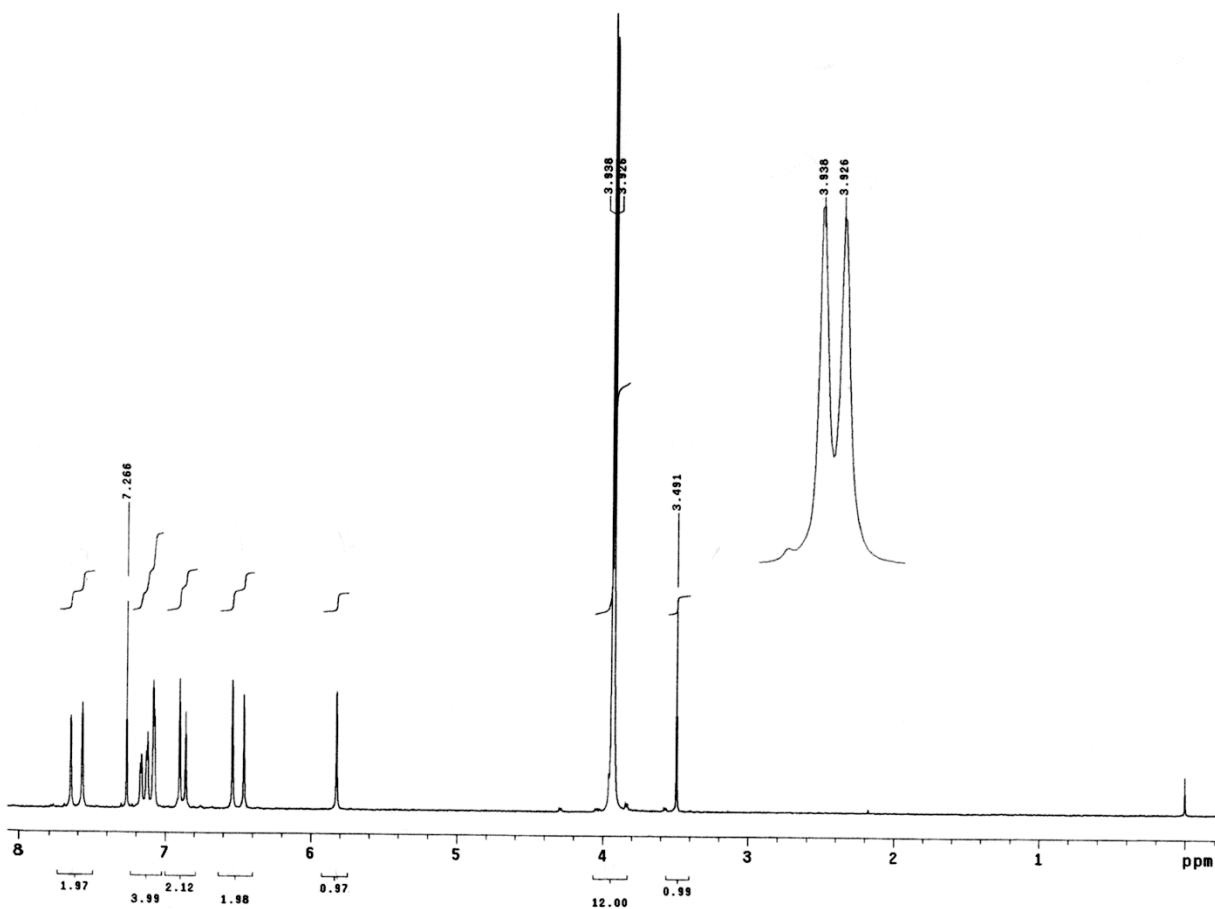

S5. NMR  $^1\text{H}$  spectrum of compound 2 recorded in a Gemini 200 MHz of Varian and  $\text{CDCl}_3$  as solvent.

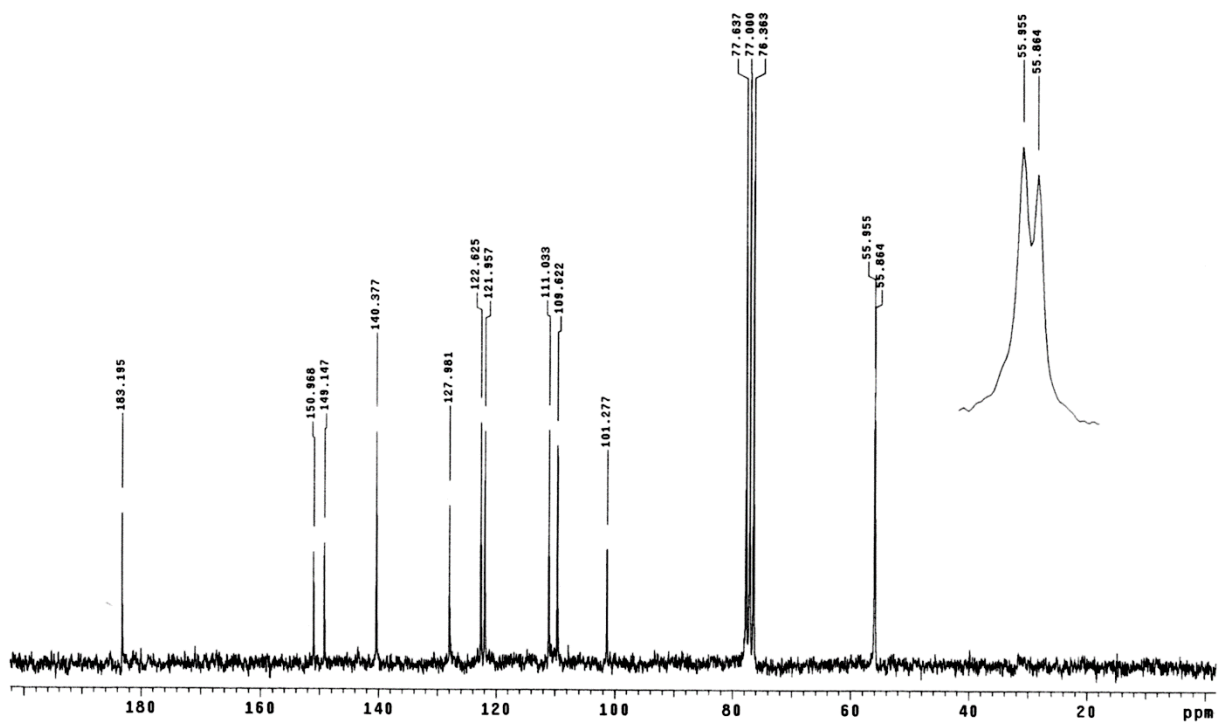

S6. NMR  $^{13}\text{C}$  spectrum of compound **2** recorded in a Gemini 200 MHz of Varian and  $\text{CDCl}_3$  as solvent.

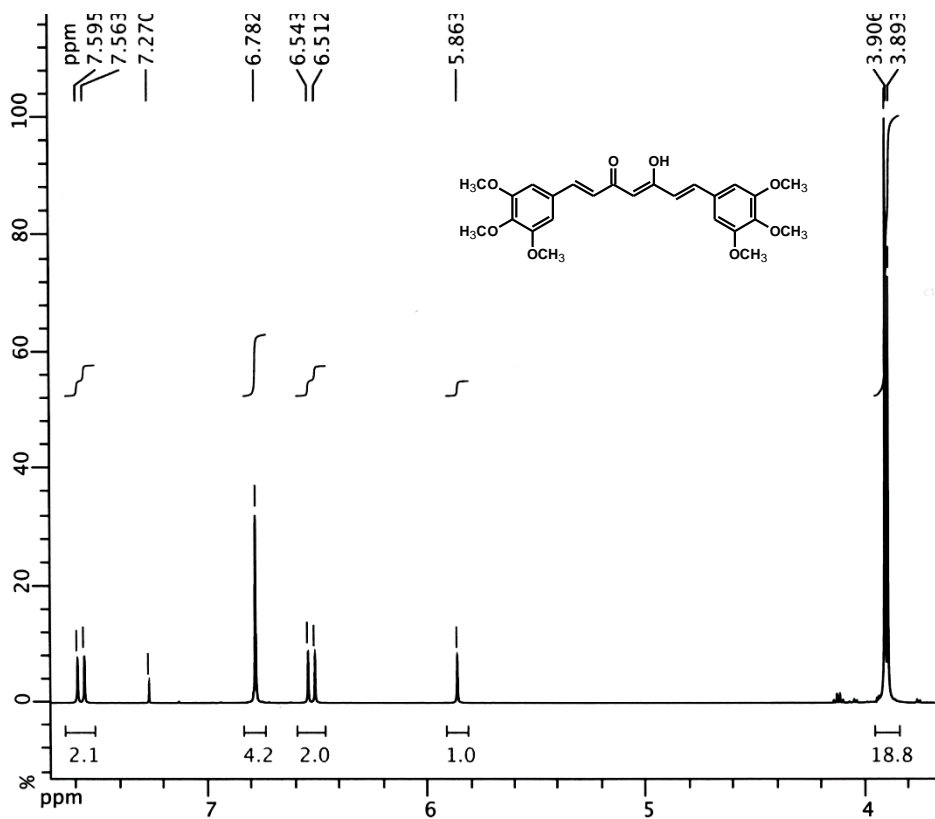

S7. NMR  $^1\text{H}$  spectrum of compound **3** recorded in a Bruker 500 MHz and  $\text{CDCl}_3$  as solvent.

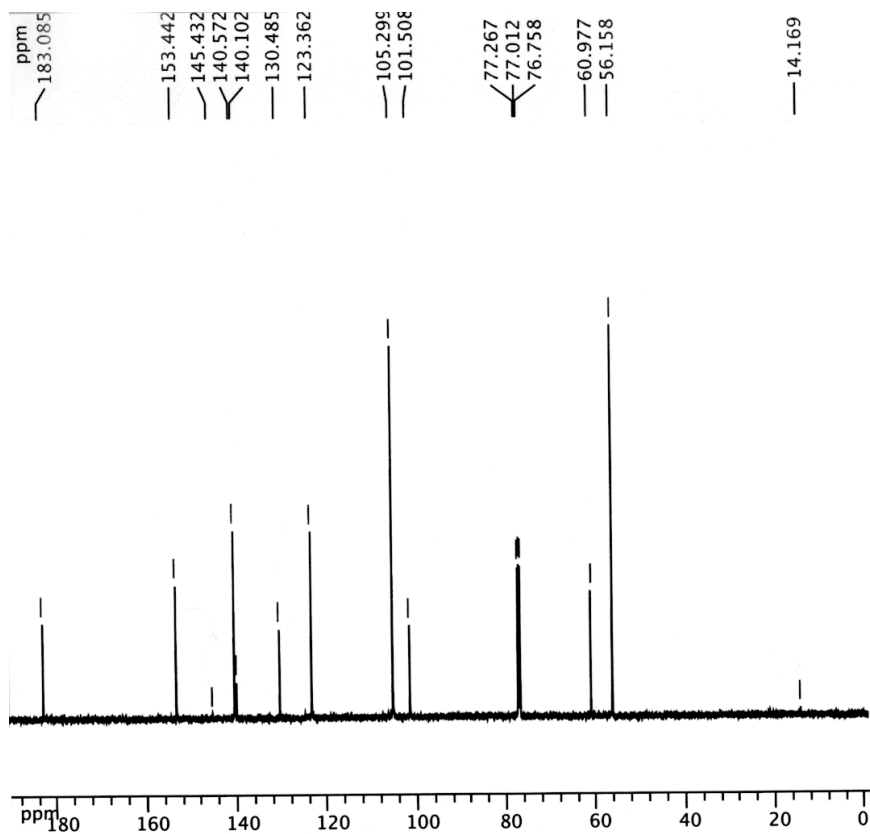

S8. NMR  $^{13}\text{C}$  spectrum of compound **3** recorded in a Bruker 500 MHz and  $\text{CDCl}_3$  as solvent.

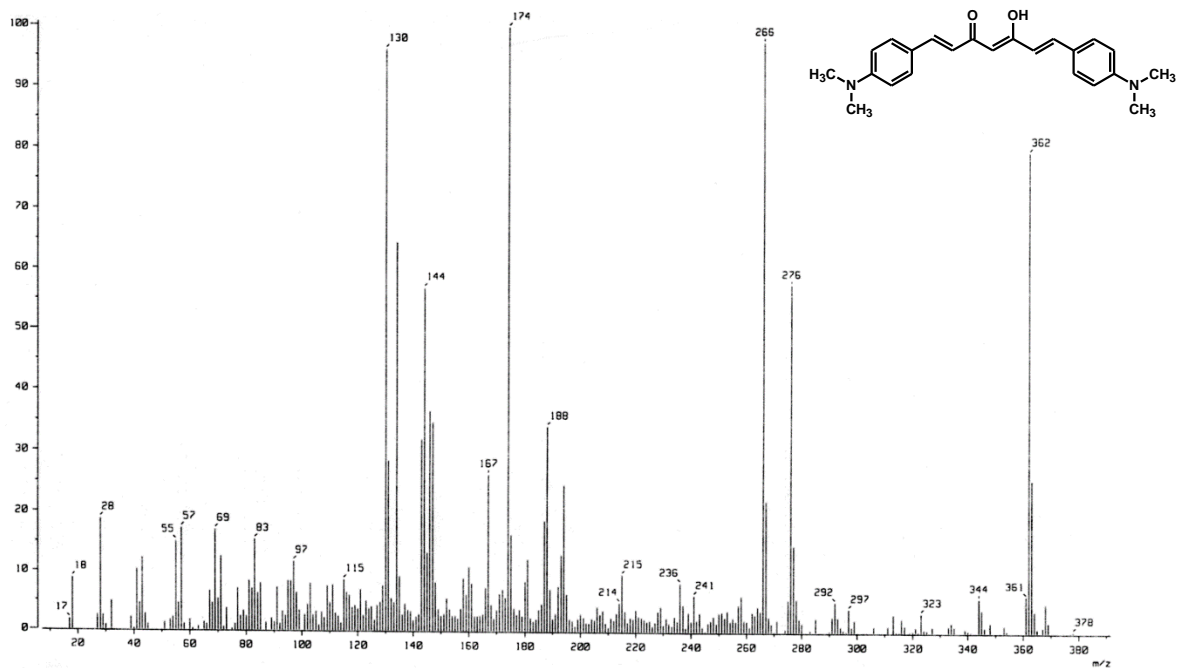

S9. Mass spectrum of compound **4** recorded in a Jeol JMS-AX505HA equipment by direct inlet and EI mode ion detection.

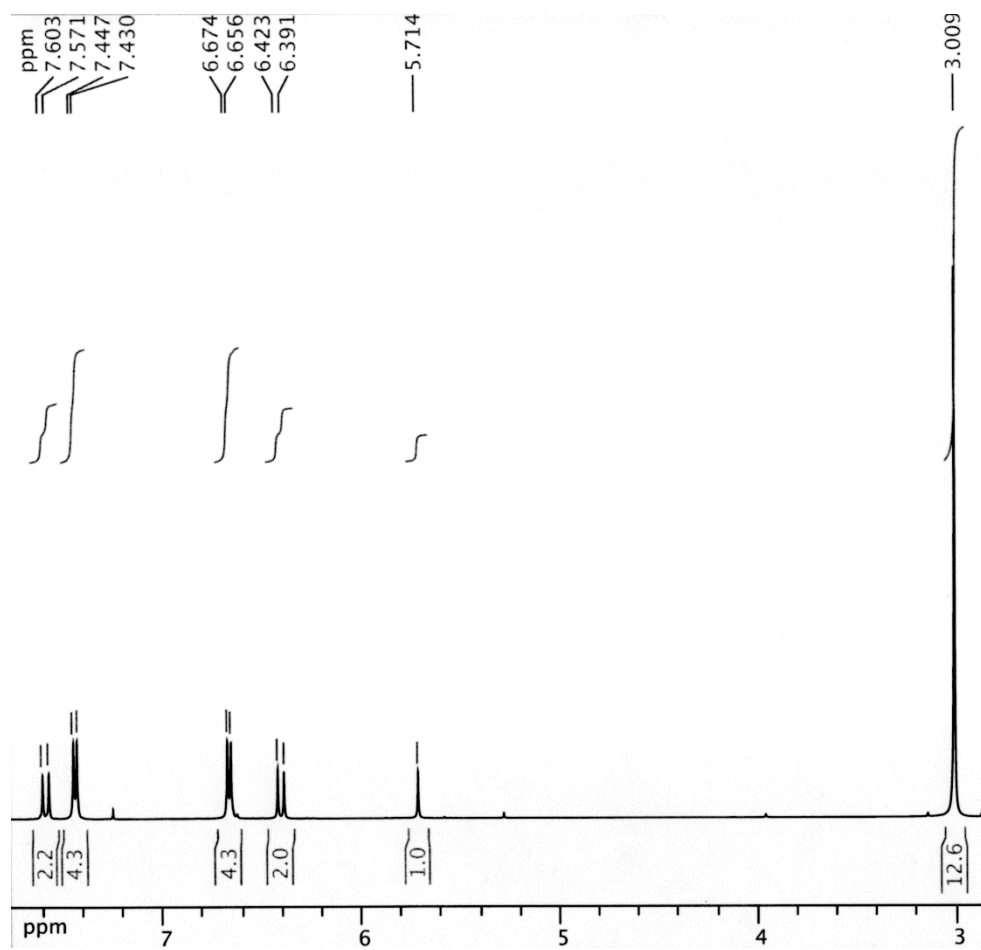

S10. NMR  $^1\text{H}$  spectrum of compound **4** recorded in a Bruker 500 MHz and  $\text{CDCl}_3$  as solvent.



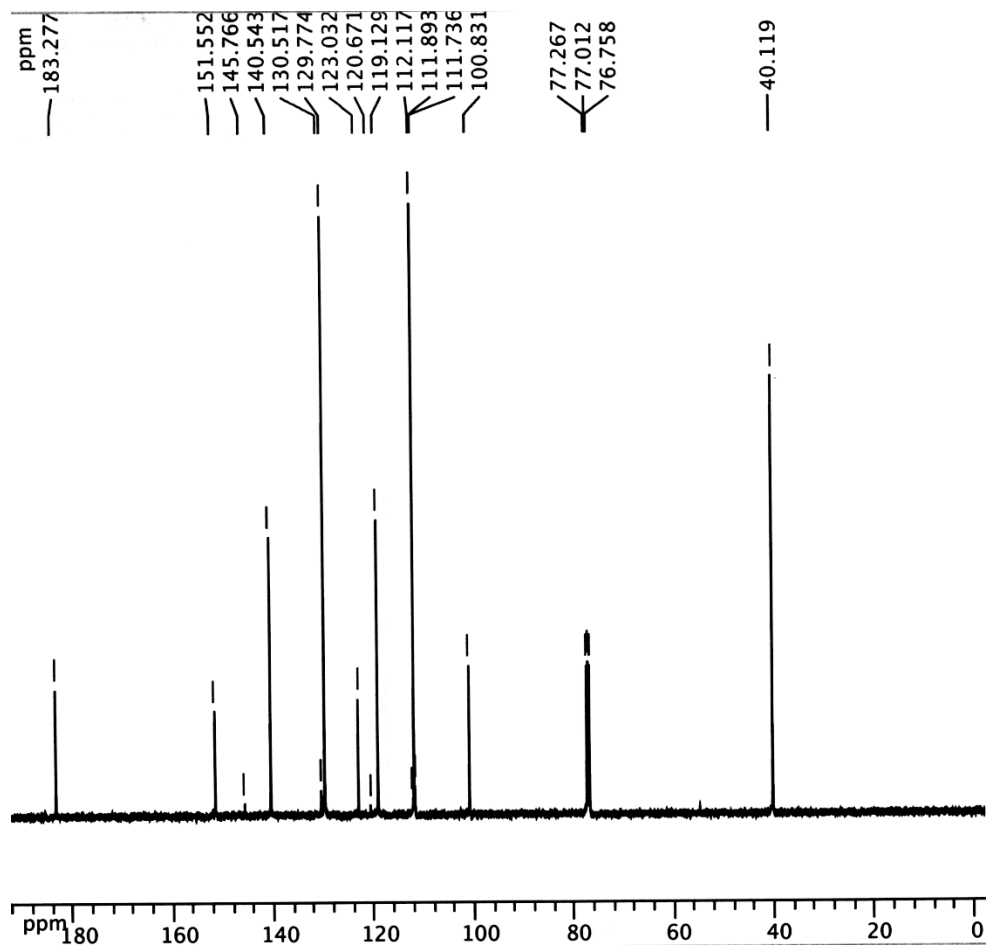

S11. NMR  $^{13}\text{C}$  spectrum of compound **4** recorded in a Bruker 500 MHz and  $\text{CDCl}_3$  as solvent.

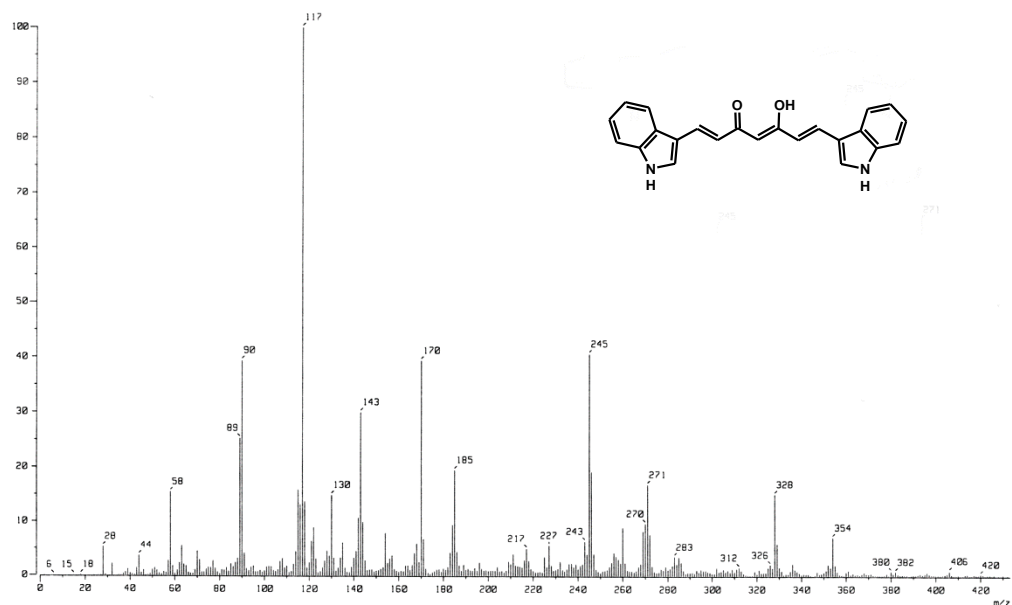

S12. Mass spectrum of compound **5** recorded in a Jeol JMS-AX505HA equipment by direct inlet and EI mode ion detection.

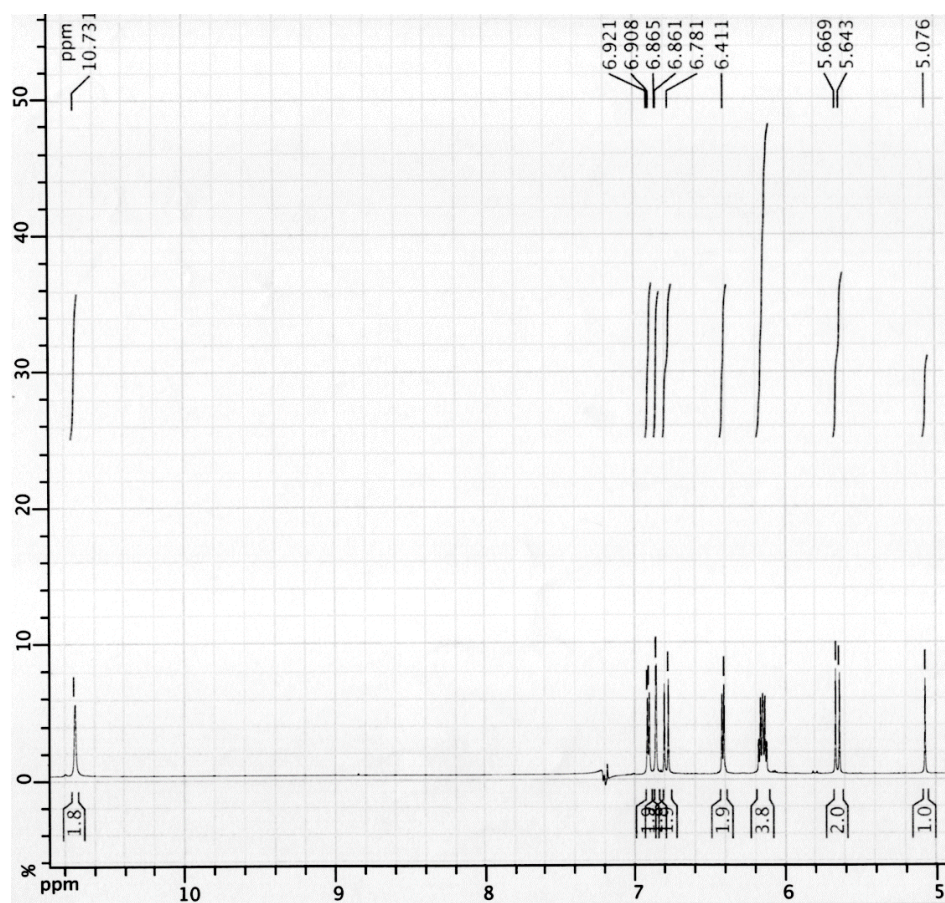

S13. NMR  $^1\text{H}$  spectrum of compound **5** recorded in a Varian 600 MHz and DMSO as solvent.

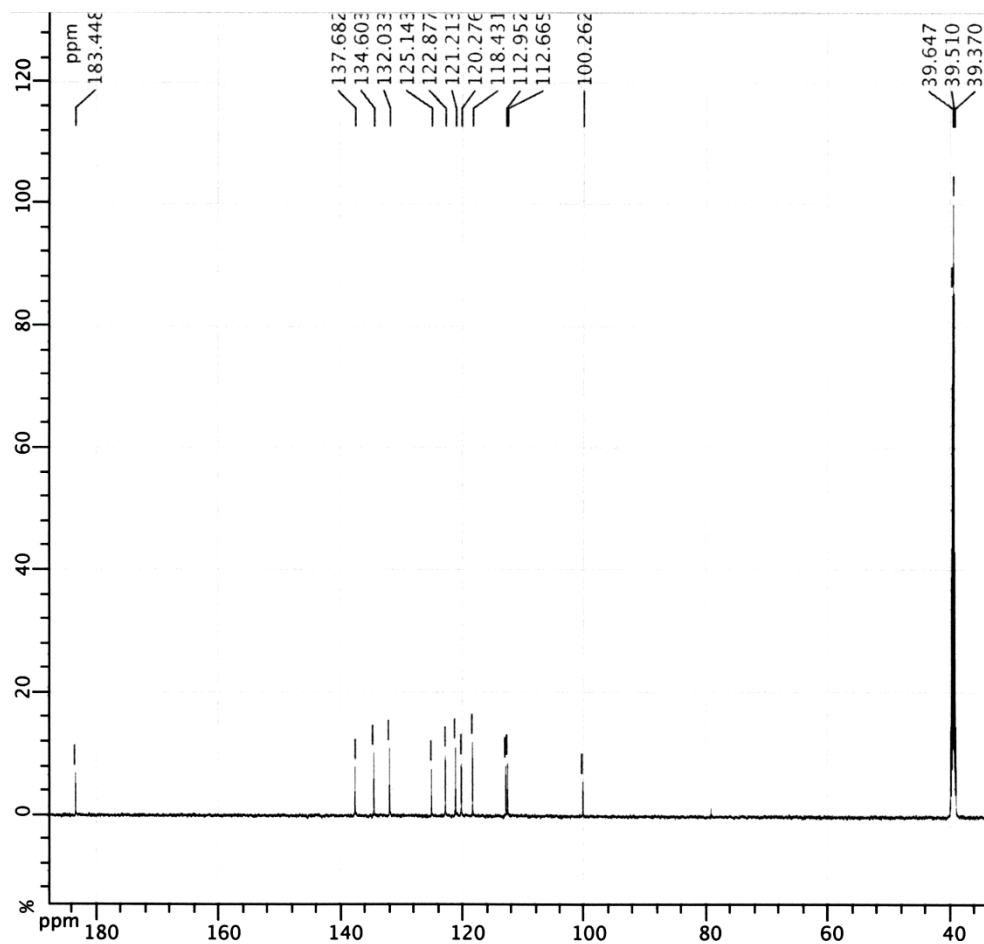

S14. NMR  $^{13}\text{C}$  spectrum of compound **5** recorded in a Varian 600 MHz and DMSO as solvent.

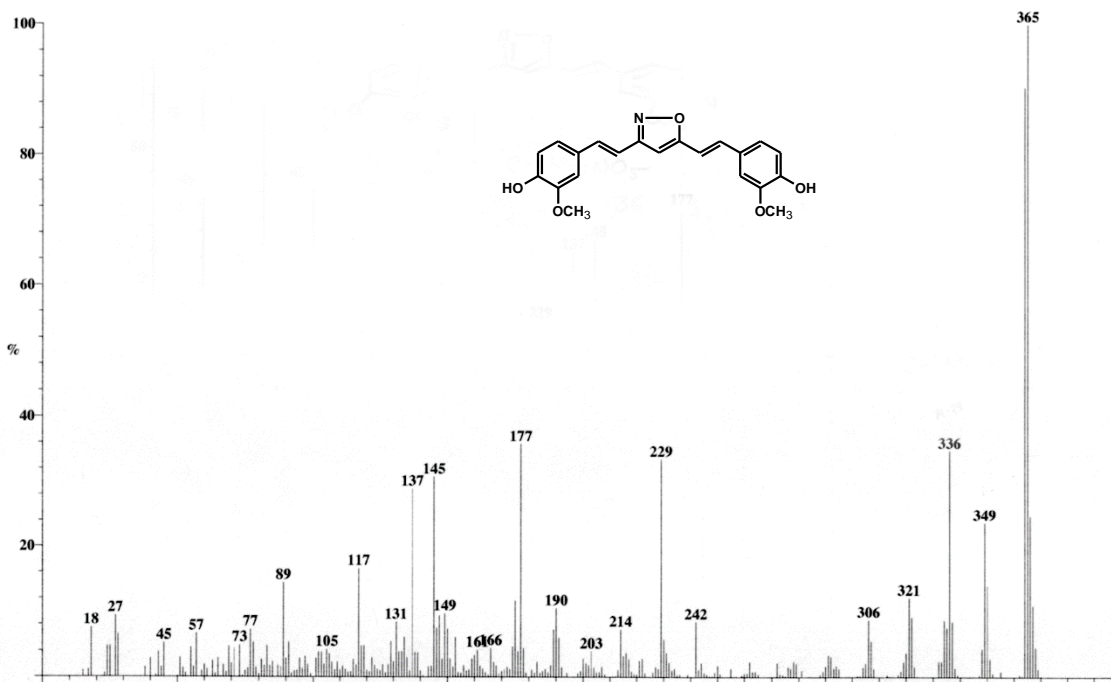

S15. Mass spectrum of compound **6** in a JEOL GCmate equipment by direct inlet and EI mode ion detection.

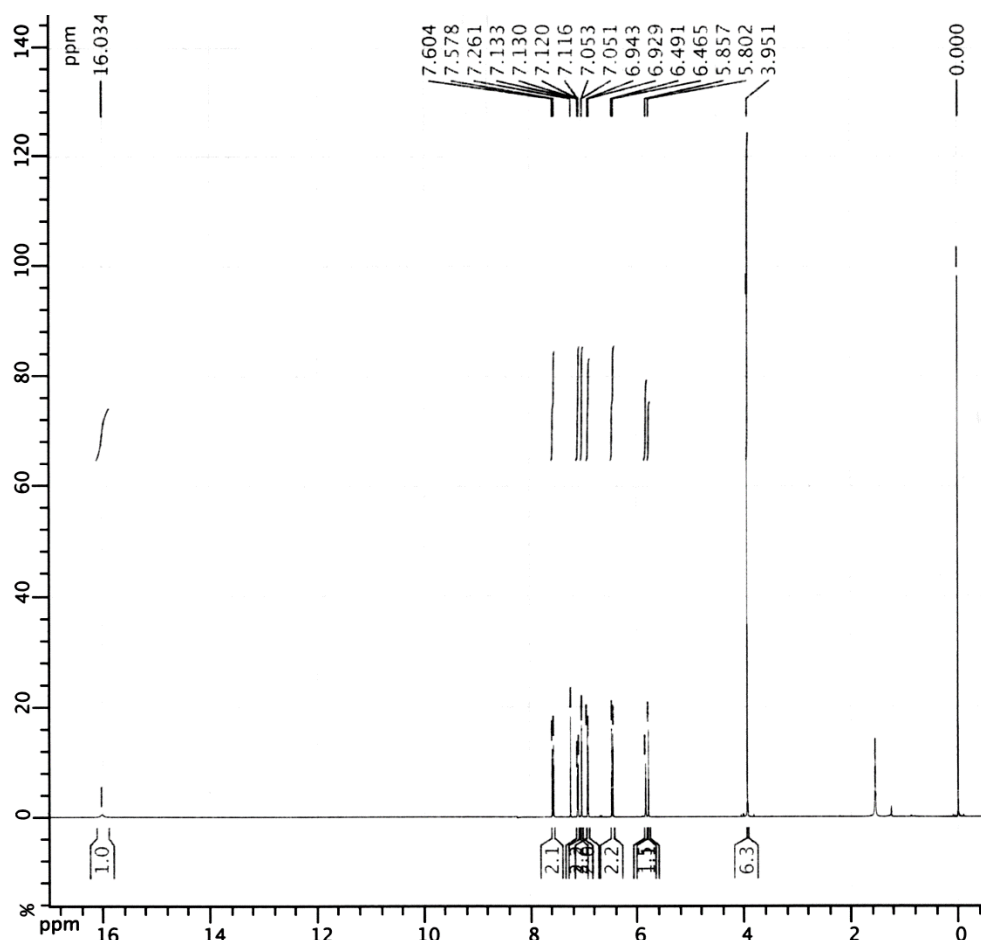

S16. NMR  $^1\text{H}$  spectrum of compound **6** recorded in a Varian 600 MHz and  $\text{CDCl}_3$  as a solvent.

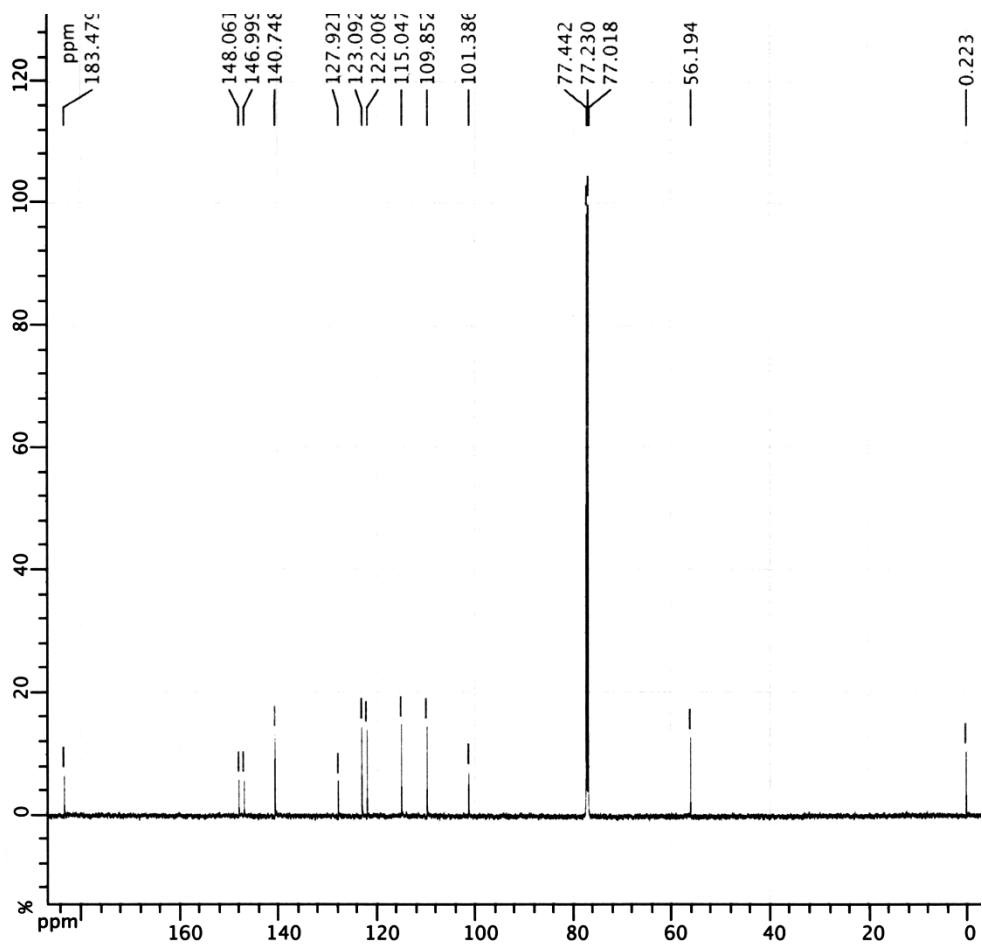

S17. NMR  $^{13}\text{C}$  spectrum of compound **6** recorded in a Varian 600 MHz and  $\text{CDCl}_3$  as solvent.

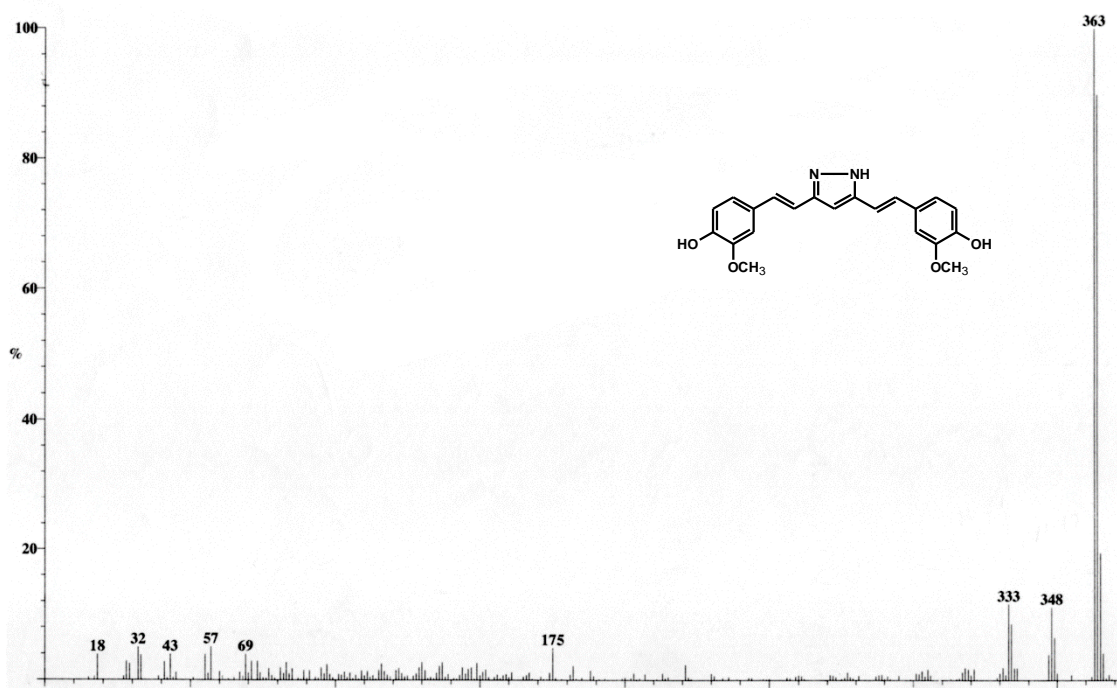

S18. Mass spectrum of compound **7** in a JEOL GCmate equipment by direct inlet and EI mode ion detection.

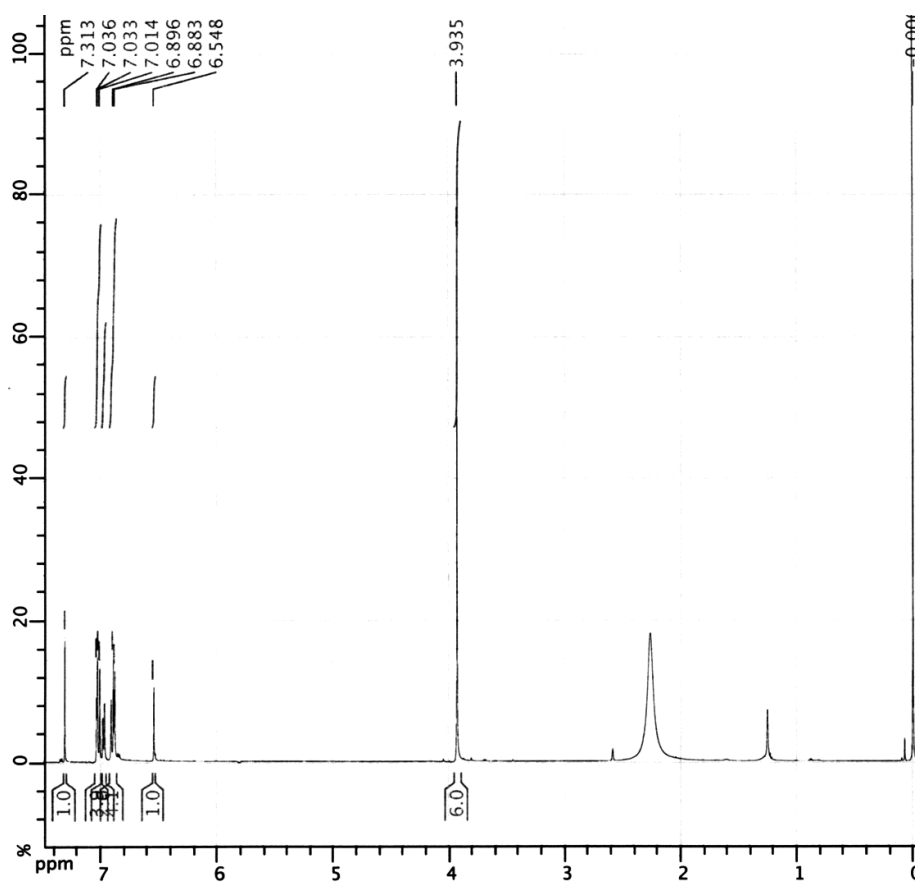

S19. NMR  $^1\text{H}$  spectrum of compound **7** recorded in a Varian 600 MHz and  $\text{CDCl}_3$  as solvent.

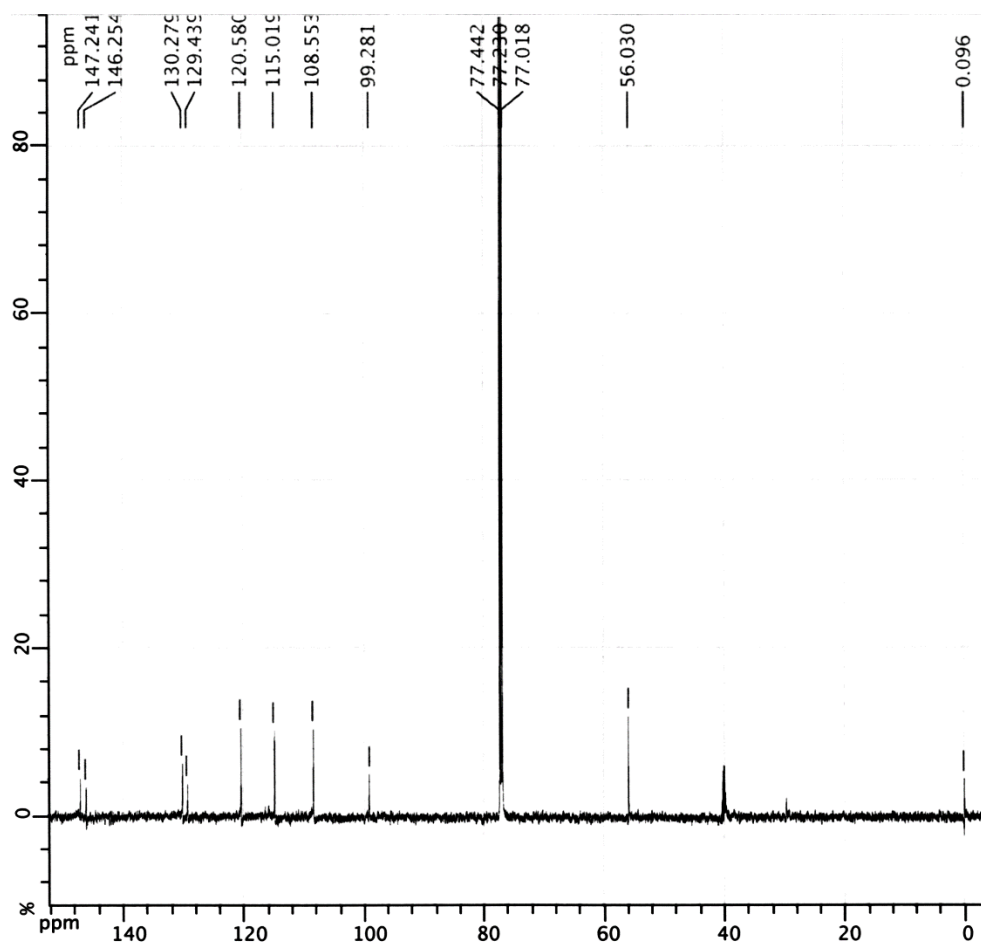

S20. NMR <sup>13</sup>C spectrum of compound 7 recorded in a Varian 600 MHz and CDCl<sub>3</sub> as solvent.

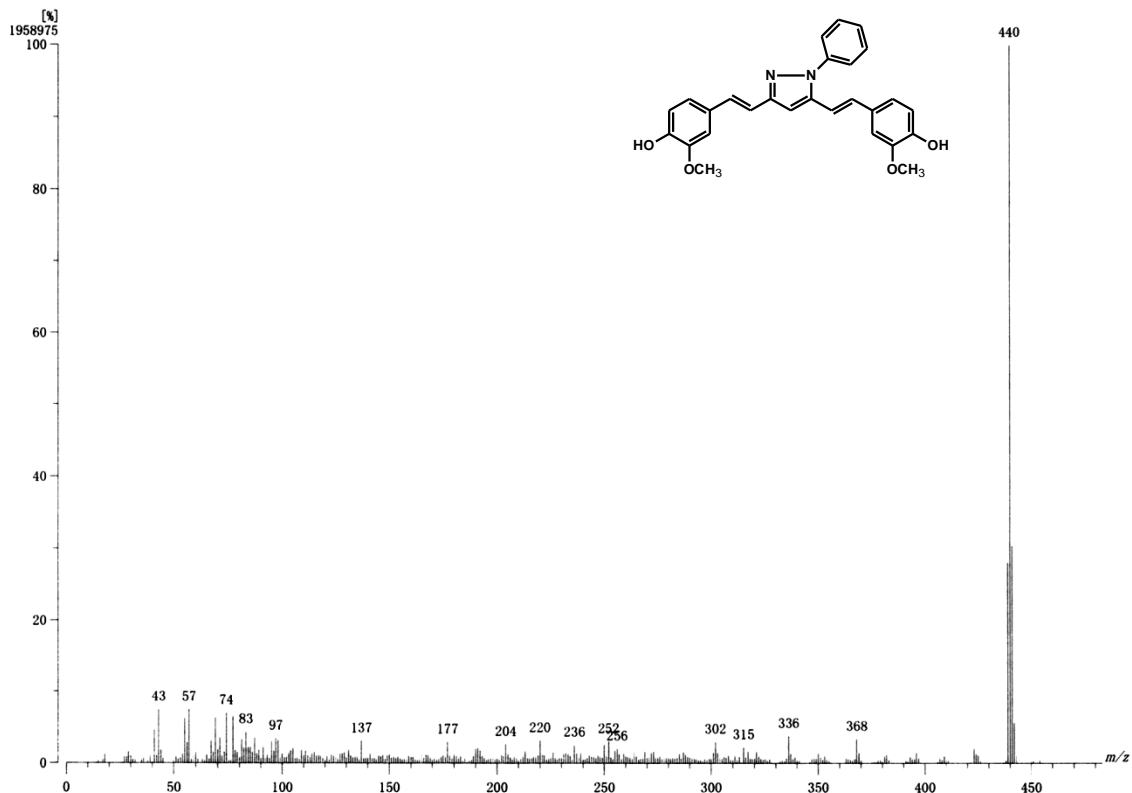

S21. Mass spectrum of compound **8** recorded in an MStation equipment by direct inlet and EI mode ion detection.

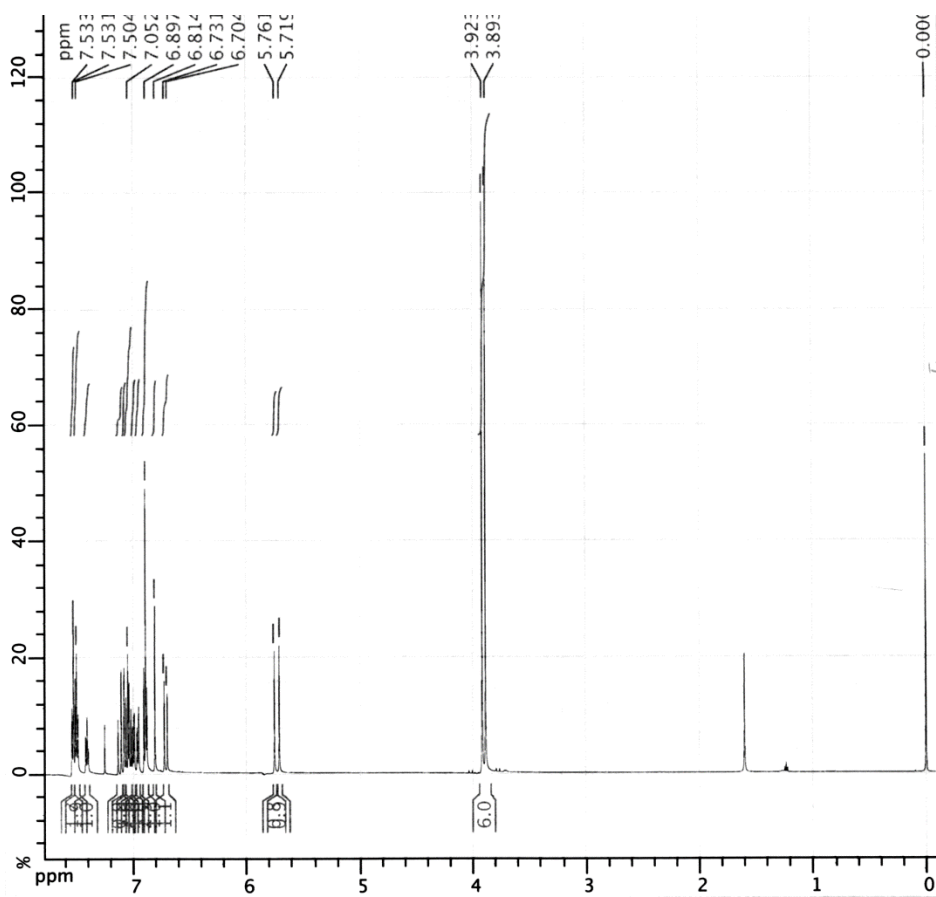

S22. NMR  $^1\text{H}$  spectrum of compound **8** recorded in a Varian 600 MHz and  $\text{CDCl}_3$  as solvent.



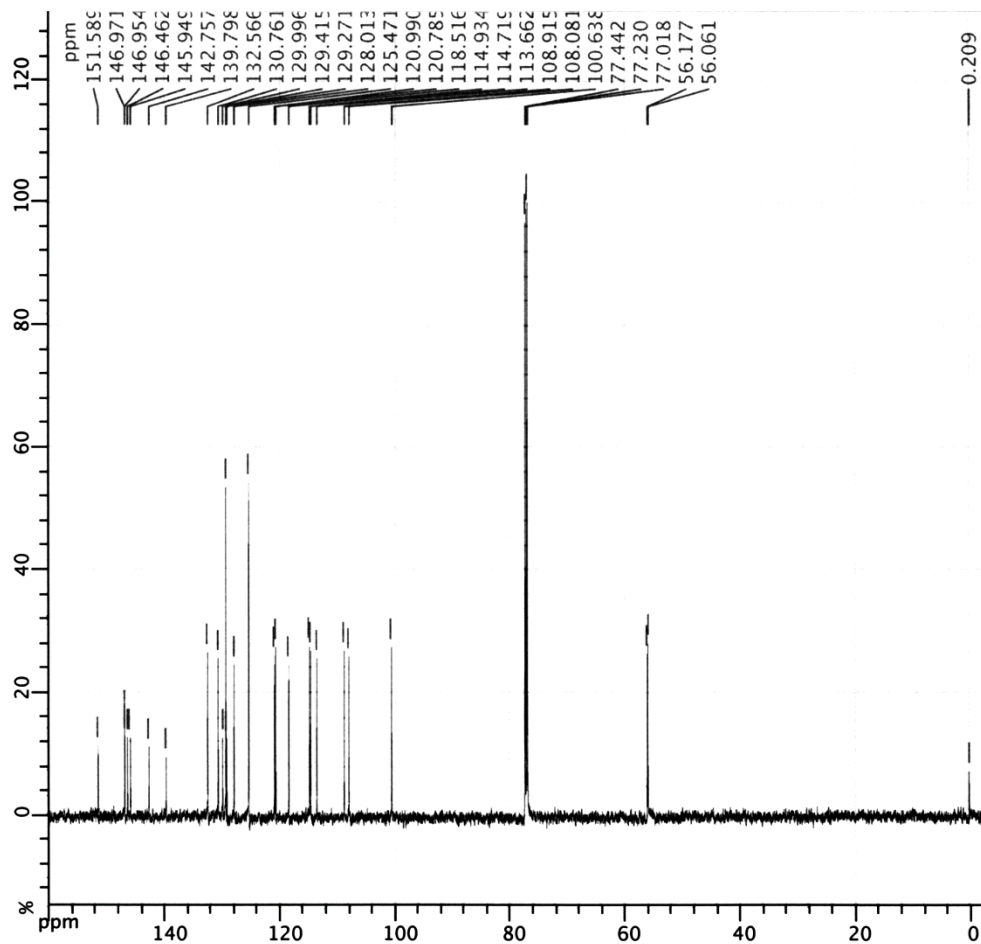

S23. NMR <sup>13</sup>C spectrum of compound **8** recorded in a Varian 600 MHz and CDCl<sub>3</sub> as solvent.

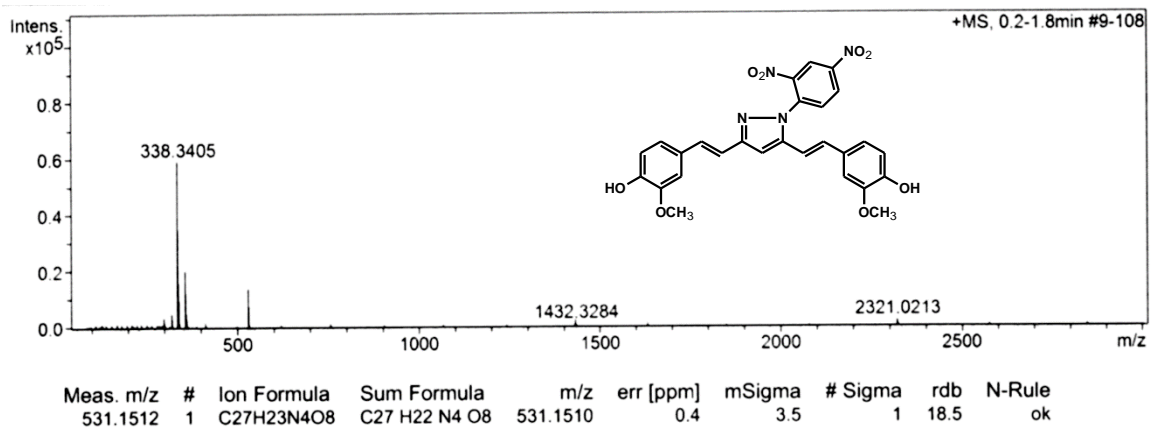

S24. Mass spectrum of compound **9** recorded in a microTOF equipment and ESI mode ion detection.

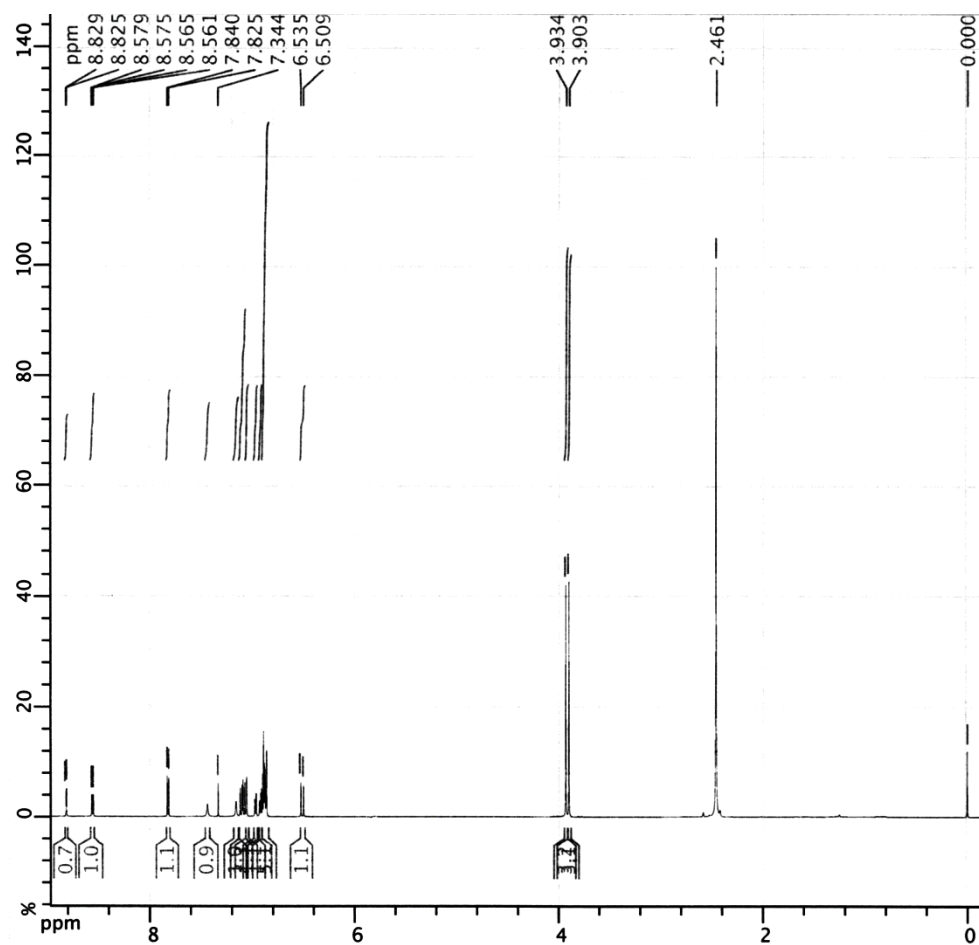

S25. NMR <sup>1</sup>H spectrum of compound **9** recorded in a Varian 600 MHz and CDCl<sub>3</sub> as solvent.

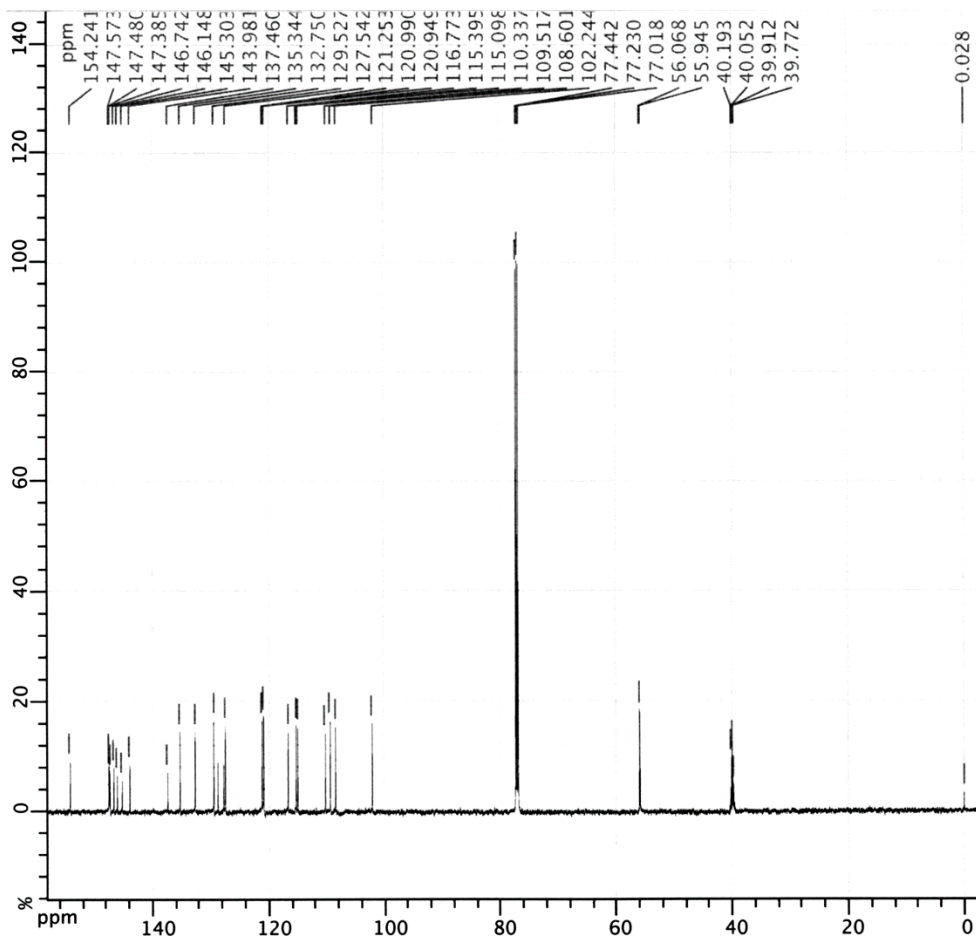

S26. NMR  $^{13}\text{C}$  spectrum of compound **9** recorded in a Varian 600 MHz and  $\text{CDCl}_3$  as solvent.

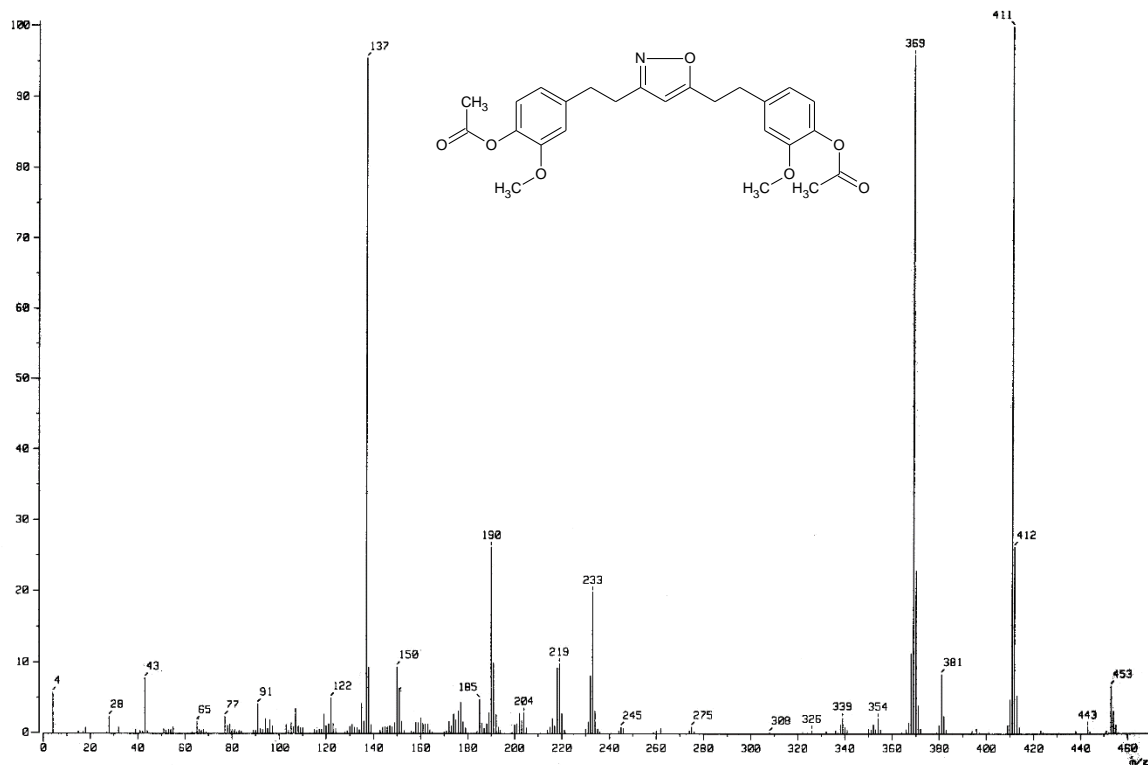

S27. Mass spectrum of compound **10** recorded in a Jeol JMS-AX505HA equipment by direct inlet and EI mode ion detection.

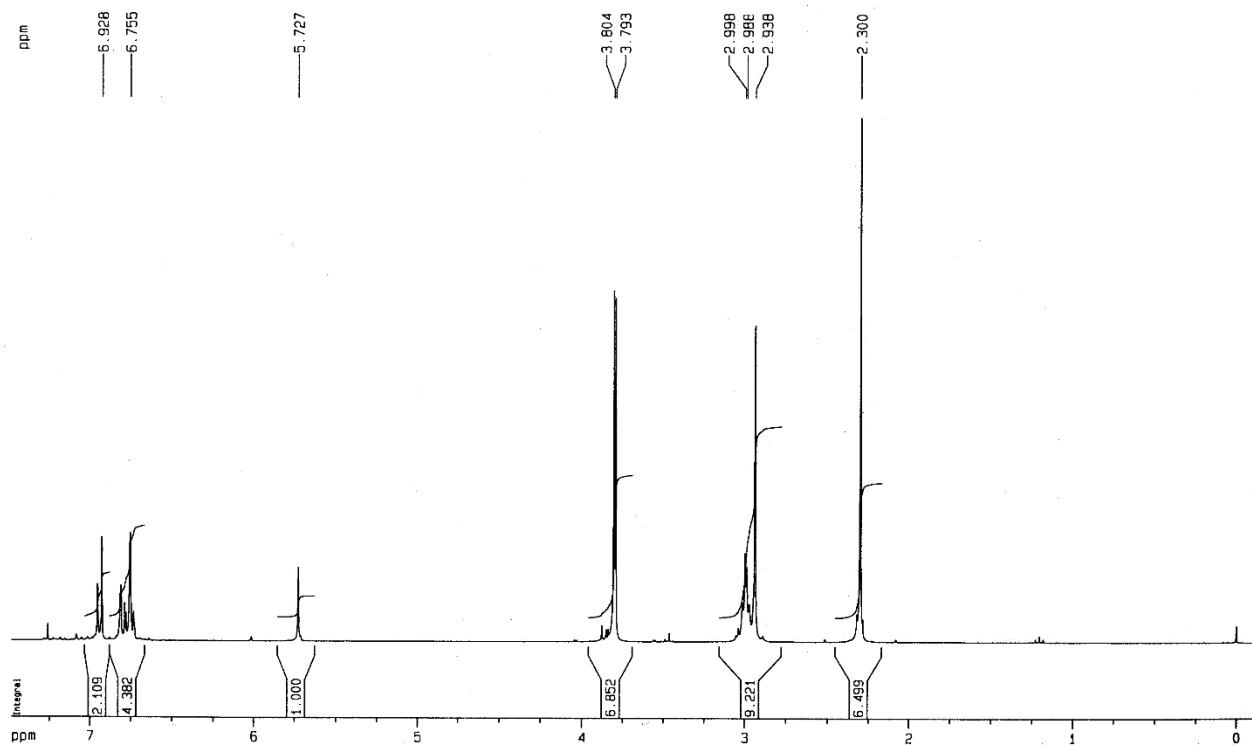

S28. NMR <sup>1</sup>H spectrum of compound **10** recorded in a Bruker 300 MHz and CDCl<sub>3</sub> as solvent.

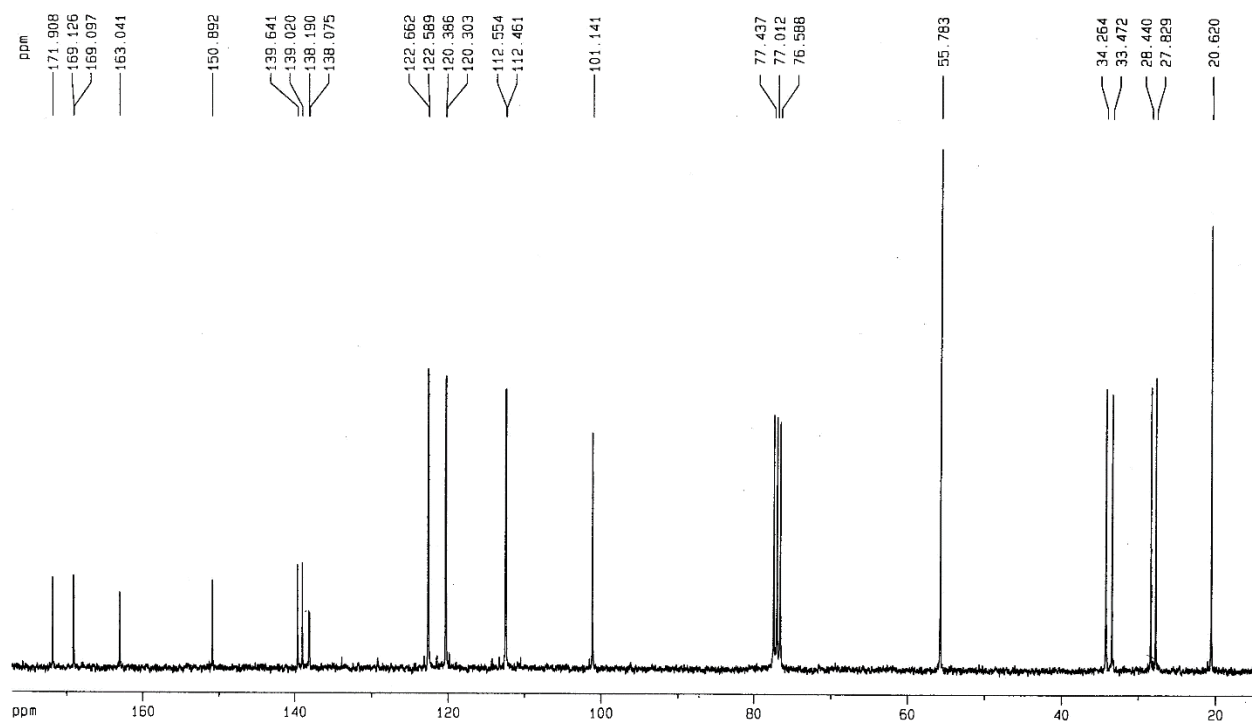

S29. NMR  $^{13}\text{C}$  spectrum of compound **10** recorded in a Bruker 300 MHz and  $\text{CDCl}_3$  as solvent.

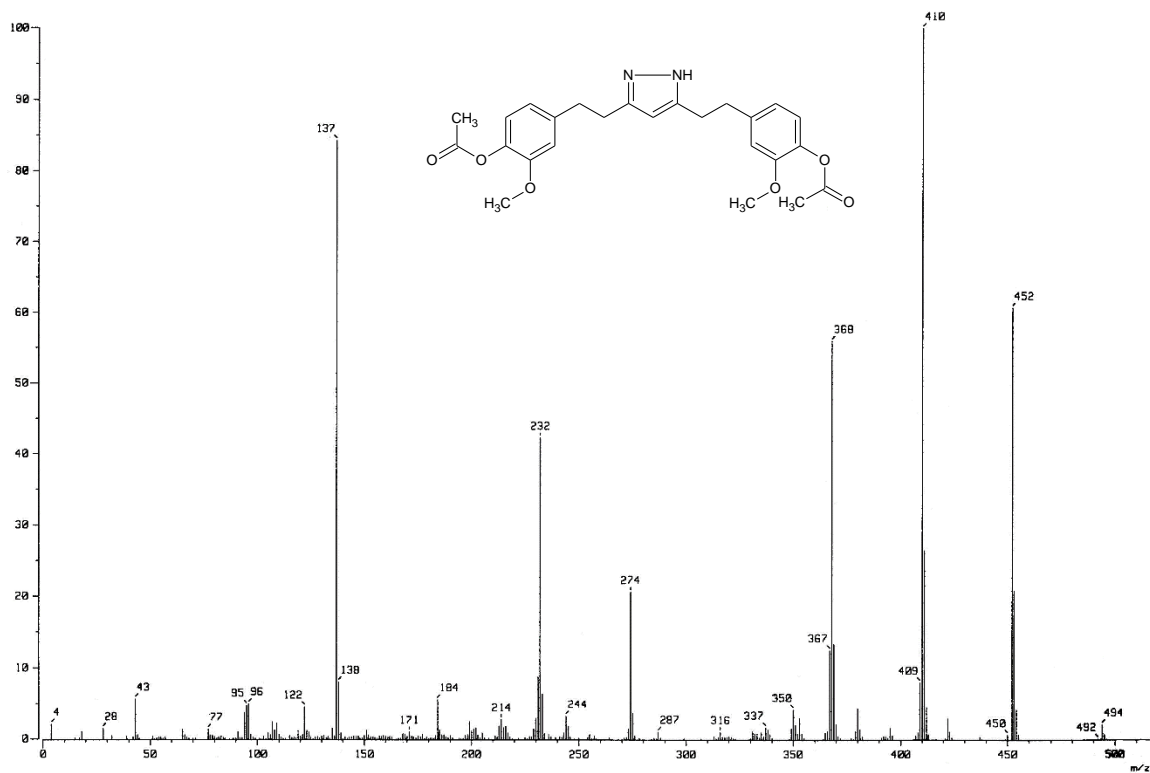

S30. Mass spectrum of compound **11** recorded in a Jeol JMS-AX505HA equipment by direct inlet and EI mode ion detection.

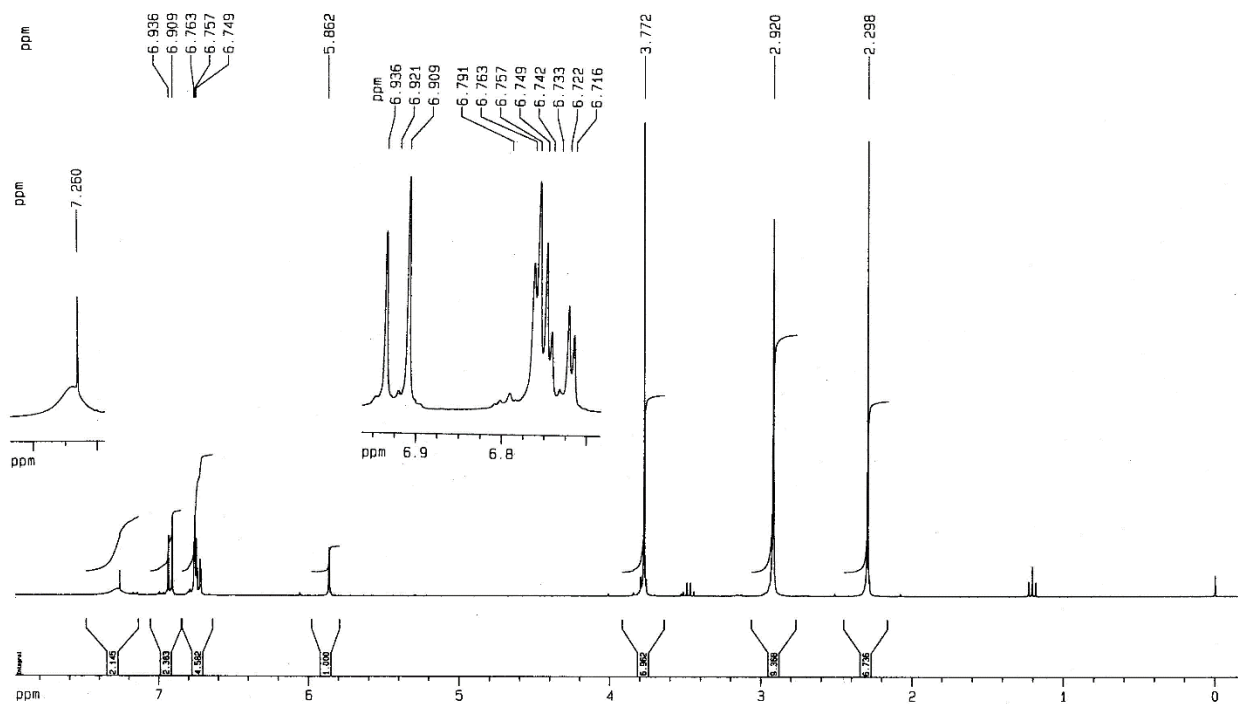

S31. NMR <sup>1</sup>H spectrum of compound **11** recorded in a Bruker 300 MHz and CDCl<sub>3</sub> as solvent.

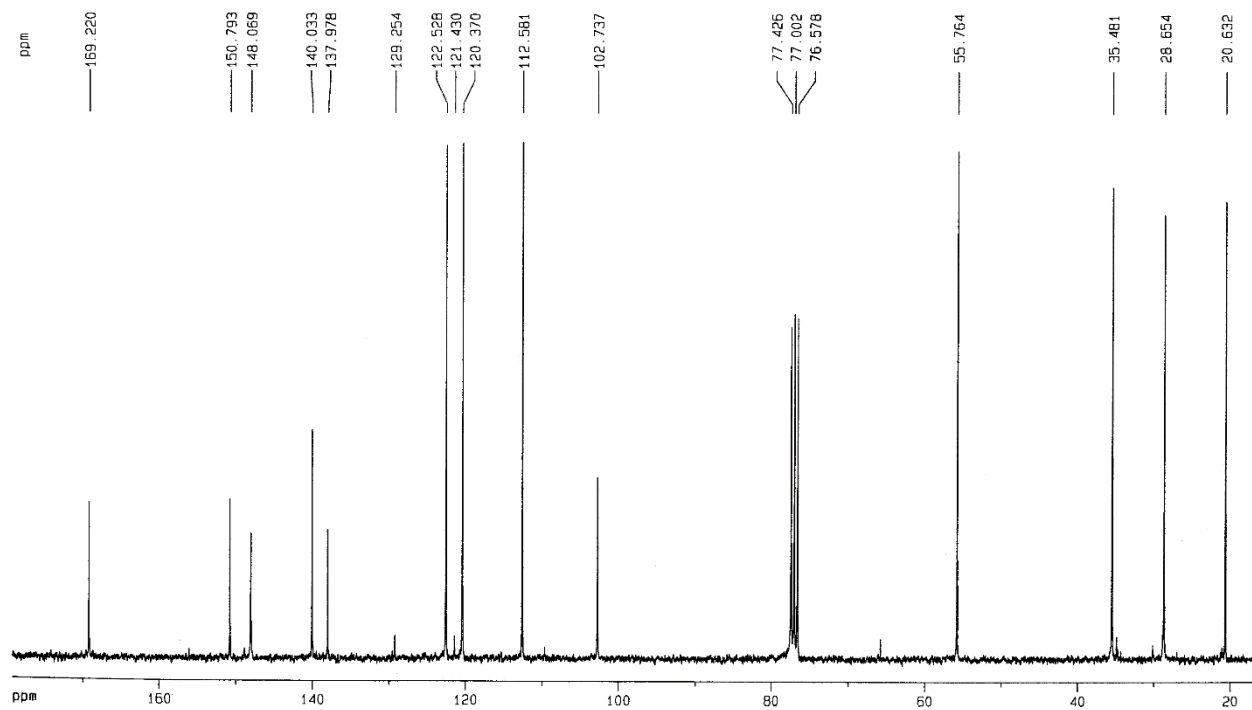

S32. NMR  $^{13}\text{C}$  spectrum of compound **11** recorded in a Bruker 300 MHz and  $\text{CDCl}_3$  as solvent.
